# Supplementary material for: Tuning the electronic properties of monolayer and bilayer PtSe2via strain engineering
Source: Royal Society of Chemistry journal article supplement (doi:10.1039/c6tc00130k), 2016-01-01
Supplement: c6tc00130k1.pdf [file c6tc00130k1.pdf]

# Electronic Supplementary Information

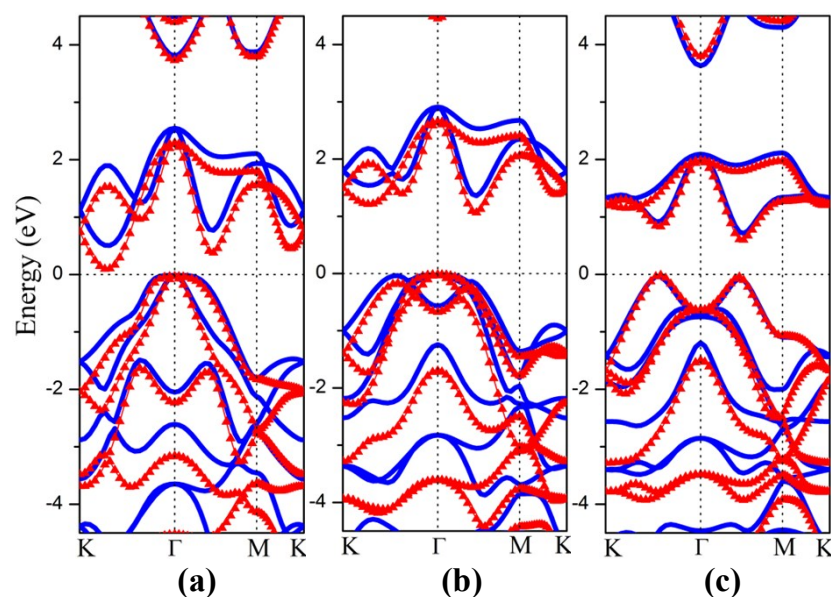

**Figure S1** Computed band structure of monolayer PtSe<sub>2</sub> with isotropic strain of (a)  $\varepsilon = -8\%$ , (b)  $\varepsilon = 0\%$  and (c)  $\varepsilon = 8\%$ . The bands in blue lines represent the computed band structures based on the semi-local DFT method, while the bands in red lines and symbols represent the computed band structures based on the DFT+U method ( $U = 4$  eV).

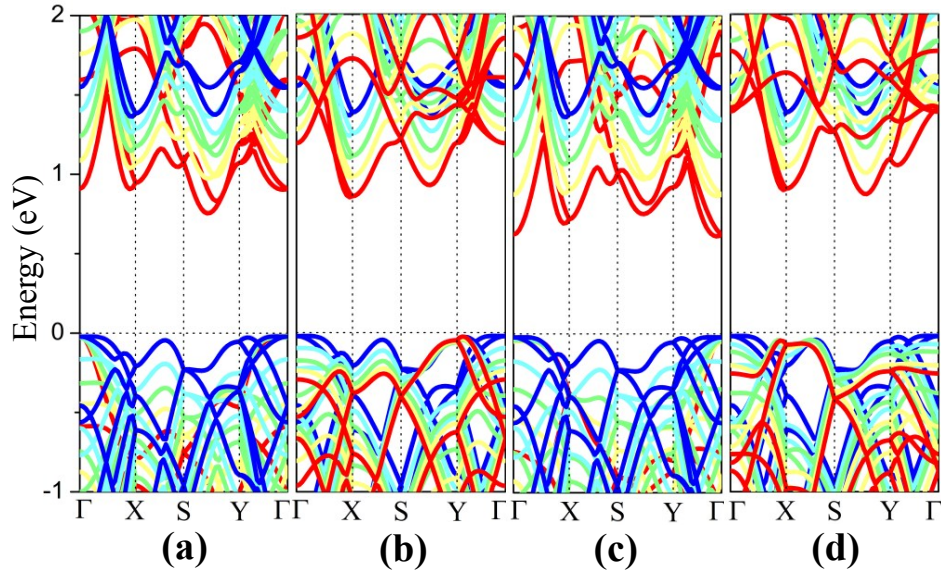

**Figure S2** Computed band structure of monolayer PtSe<sub>2</sub> with strain of (e)  $\epsilon_x = -8\% \sim 0\%$ , (f)  $\epsilon_x = 0\% \sim 8\%$ , (g)  $\epsilon_y = -8\% \sim 0\%$  and (h)  $\epsilon_y = 0\% \sim 8\%$ . The bands plotted with different color represent the computed band structures corresponding to different strains: blue ( $\epsilon = 0\%$ ), cyan ( $\epsilon = \pm 2\%$ ), green ( $\epsilon = \pm 4\%$ ), yellow ( $\epsilon = \pm 6\%$ ) and red ( $\epsilon = \pm 8\%$ ). The Fermi level is located at 0 eV.
